# Supplementary material
Source: HighWire-hosted journal article supplement (https://erj.ersjournals.com/content/51/3/1702421)
Supplement: inline-supplementary-material-1 [file inline-supplementary-material-1.pdf]

Table S1. Validation of self-reported sleep apnea in a subsample from the Nurses' Health Studies<sup>1</sup>

|                                       |                     |
|---------------------------------------|---------------------|
|                                       | Median (range)      |
| Apnea-Hypopnea Index                  | 21 (6, 58)          |
| Lowest oxygen saturation, %           | 78 (52, 88)         |
| Sleep duration, min                   | 316 (204, 482)      |
| Sleep efficiency, %                   | 75 (49, 90)         |
| Waist circumference, cm               | 108.0 (74.3, 165.7) |
| Neck circumference, cm                | 36.2 (24.8, 54.6)   |
|                                       | Percent             |
| Apnea-Hypopnea Index category         |                     |
| Mild (5-14)                           | 11                  |
| Moderate (15-29)                      | 58                  |
| Severe ( $\geq 30$ )                  | 31                  |
| Diagnostic methods <sup>2</sup>       |                     |
| In-lab polysomnography                | 92                  |
| Home sleep apnea test                 | 9                   |
| Overnight oxymetry                    | 24                  |
| Evaluation of symptoms by a physician | 28                  |
| Other                                 | 6                   |
| Type of sleep apnea                   |                     |
| Obstructive                           | 98                  |
| Central                               | 1                   |
| Mixed                                 | 1                   |
| Symptoms <sup>2</sup>                 |                     |
| Loud snoring                          | 65                  |
| Excessive daytime sleepiness          | 47                  |
| Fatigue                               | 72                  |
| Witnessed apnea                       | 36                  |
| Other <sup>3</sup>                    | 21                  |
| Treatment <sup>2</sup>                |                     |
| CPAP <sup>4</sup>                     | 93 (72)             |
| Oral appliance <sup>3</sup>           | 15 (5)              |
| Oxygen machine                        | 15                  |
| Surgery <sup>5</sup>                  | 6                   |
| Weight loss                           | 45                  |
| Frequency of current CPAP use         |                     |
| 1-2 nights per week                   | 0                   |
| 3 or more nights per week             | 100                 |

<sup>1</sup>The supplemental questionnaire and request for medical record were sent to 150 NHS/NHSII participants. A total of 108 women returned the questionnaire, and 8 women did not give content for medical record access. Medical records were obtained for 96 women. Data on Apnea-Hypopnea Index, lowest oxygen saturation, sleep duration and sleep efficiency were

extracted from medical records; other data were based on self-reports.

<sup>2</sup>The sum exceeds 100% as women were allowed to check all that apply

<sup>3</sup>Other reported symptoms that have led to sleep apnea diagnosis included frequency arousal, morning headache, frequent urination, nightmare, restless leg syndrome, and temporomandibular joint disorders

<sup>4</sup>The number in the parentheses is the percent for current users

<sup>5</sup>Only two types of surgery were reported, nasal surgery and weight-loss surgery

Table S2. Prevalence of self-reported sleep apnea diagnosis in the health professionals compared to the projected US prevalence of moderate-to-severe sleep-disordered breathing (AHI $\geq$ 15)

|                            | Women             |                           | Men                  |                           |
|----------------------------|-------------------|---------------------------|----------------------|---------------------------|
|                            | Nurses            | US estimates <sup>1</sup> | Health Professionals | US estimates <sup>1</sup> |
| Age <50 yrs <sup>2</sup>   |                   |                           |                      |                           |
| Overall                    | 5.5 (4.5, 6.8)    | 3.0 (2.0, 4.0)            | --                   | 10.0 (7.0, 12.0)          |
| BMI <25                    | 1.8 (1.4, 2.3)    | 0.2 (0.1, 0.3)            | --                   | 0.9 (0.5, 1.6)            |
| BMI 25-29.9                | 4.0 (3.2, 5.0)    | 0.7 (0.3, 1.2)            | --                   | 3.8 (2.5, 5.3)            |
| BMI 30-39.9                | 10.6 (8.6, 12.9)  | 3.6 (2.0, 5.7)            | --                   | 16.6 (12.5, 21.7)         |
| BMI $\geq$ 40              | 24.5 (20.5, 29.1) | 18.6 (11.7, 27.0)         | --                   | 55.0 (41.8, 69.2)         |
| Age 50-70 yrs <sup>3</sup> |                   |                           |                      |                           |
| Overall                    | 7.5 (7.2, 7.8)    | 9.0 (7.0, 11.0)           | 13.7 (12.7, 14.8)    | 17.0 (15.0, 21.0)         |
| BMI <25                    | 2.5 (2.3, 2.6)    | 1.4 (0.7, 2.5)            | 7.4 (6.8, 8.1)       | 3.6 (2.0, 5.4)            |
| BMI 25-29.9                | 5.4 (5.2, 5.7)    | 4.5 (3.0, 6.3)            | 13.2 (12.3, 14.2)    | 10.6 (8.2, 13.0)          |
| BMI 30-39.9                | 13.9 (13.5, 14.3) | 13.9 (10.4, 17.4)         | 27.1 (25.3, 29.0)    | 29.0 (24.6, 33.9)         |
| BMI $\geq$ 40              | 30.8 (29.5, 32.2) | 33.5 (25.7, 40.8)         | 49.3 (40.7, 57.9)    | 56.0 (46.3, 65.3)         |

<sup>1</sup>The numbers were extracted from Peppard et al., which projected the findings from the Wisconsin Sleep Cohort Study to the NHANES population distribution to estimate the national prevalence

<sup>2</sup>The age range in women was 47-49 yrs in the female nurses, and 30-49 yrs in Peppard et al.

<sup>3</sup>The age range in men was 65-70 yrs in the male health professionals, and 50-70 yrs in Peppard et al.
